# Supplementary material
Source: publisher site journal article supplement (https://www.dovepress.com/article/474211)
Supplement: Supplementary file 1 [file get_supplementary_file.php]

**Supplementary Material 1: Methods and steps of single-cell RNA sequencing**

**Single-cell RNA statistical analysis**

The cells contained 200-7000 expressed genes, and when the mitochondrial UMI rate was less than 10%, the cells were filtered, and mitochondrial genes were removed from the expression table. The Seurat package (version: 4 https://satijalab.org/seurat/) was used for cell normalization and regression based on the expression table according to the UMI counts of each sample and percent of mitochondria rate to obtain the scaled data. PCA was constructed based on the scaled data with the top 2000 highly variable genes, and the top 50 principal components were used for tSNE construction and UMAP construction.

Utilizing the graph-based clustering method (resolution =1), we acquired the unsupervised cell cluster result based on the top 50 principal components of the PCA, and we calculated the marker genes by the FindAllMarkers function with the Wilcoxon rank sum test algorithm under the following criteria: 1. lnFC > 0.25; 2. p value<0.05; 3. min.pct>0.1. To identify the cell type in detail, clusters of the same cell type were selected for retSNE analysis, graph-based clustering and marker analysis.

**GO analysis and KEGG enrichment**

Gene Ontology (GO) enrichment analysis of marker genes was implemented by the clusterProfiler R package, in which gene length bias was corrected. GO terms with corrected P values less than 0.05 were considered significantly enriched for marker genes.

KEGG is a database resource for understanding high-level functions and utilities of biological systems, such as cells, organisms and ecosystems, from molecular-level information, especially large-scale molecular datasets generated by genome sequencing and other high-throughput experimental technologies (http://www.genome.jp/kegg/). We used the clusterProfiler R package to test the statistical enrichment of marker genes in KEGG pathways.

**Pseudotime trajectory analysis**

Pseudotime analysis refers to the prediction of the developmental or differentiation trajectory of cells by calculating the gradient relationship of gene expression levels between cells. This is done to construct a virtual timeline where all cells are positioned based on their predicted order of appearance. Pseudotime analysis is commonly applied to samples from developmental processes or time-series samples following drug treatments. Pseudotime analysis aids in identifying key genes that play crucial roles over time or at developmental or differentiation nodes.

We utilized Monocle2 for pseudotime analysis. Monocle2 employs the technique of reversed graph embedding to learn the main structure of cell trajectories and subsequently sorts cells along these trajectories. This approach allows for an accurate interpretation of complex biological processes.

**Cell communication CellPhoneDB**

Cell communication refers to the ability of cells to receive, process, and transmit signals from both their environment and themselves. Cell communication is a fundamental attribute of all cells in every organism, including bacteria, plants, and animals. Cell communication is crucial for coordinating various biological processes, such as development, differentiation, and inflammation. Errors in cell communication can lead to the occurrence of diseases, including diabetes, thyroid disorders (hypothyroidism and hyperthyroidism), multiple sclerosis, cancer, and schizophrenia.

With the development of single-cell RNA sequencing (scRNA-seq) technology, it has become possible to measure the expression of signals in different cell types. This enables the systematic decoding of intercellular communication networks and, ultimately, an understanding of the functions of tissues in their balanced state and how they change in disease.

CellPhoneDB has constructed a signalling database based on UniProt, Ensemble, PDB, IUPHAR, and other resources. CellPhoneDB uses the expression levels of these signals to predict interactions between different cells, thereby inferring the communication relationships between cells.
